# Supplementary material
Source: publisher figshare collection journal article supplement (https://tandf.figshare.com/ndownloader/files/14611265)
Supplement: Supplementary file 1 [file 14611265]

**Supplementary materials for**

*De novo* origination of *MIRNAs* through generation of short inverted repeats in target genes

Shanfa Lu

**Figure** **S1.** Hairpin structures of *MIR12112* precursors in the order Lamiales.

**Table S1.** A list of high throughput illumina and 454 RNA-seq data analysed for *MIR058* and *AasPPO-as-hp*.

**Table S2.** A list of high throughput illumina and 454 RNA-seq data analysed for *MIR12112*.

**Figure S1.** Hairpin structures of *MIR12112* precursors in the order Lamiales. Mature miRNA sequences are shown in red.

**Acanthaceae**

***Acanthus leucostachyus Ale-MIR12112*** (ΔG=-62.2)

GG A G

5’- CGGAGCUGCCACCGUCGGUGGUAUCAAAAUCG GUUGUGGG U

|| ||||||||||| ||||||||||| |||| |||| ||

3’- GCAGCGGCGGUGGUAACCACCAUAGUUCUAGC CGGCCUCC G

CG - A

***Acanthus ilicifolius Ail-MIR12112*** (ΔG=-54.1)

GG A AUCAC

5’- CGGAGCUGCCACUGUUGGUGGUAUCAAAAUCG GC C

||| ||||||||||||||||||||||| |||| ||

3’- GCCGCGGCGGUGGUAACCACCAUAGUUCUAGC CG A

CG - GCUGC

***Andrographis paniculata Apa-MIR12112*** (ΔG=-47.4)

GAGCAGCAAA

5’-GGCGGCGCCGCCACCAUUGAUGGGGUCAAAAUC G

|||||||| |||||||||| ||| |||| |||

3’-CCGUCGUGACGGUGGUAACCACCAUAGUUCUAG C

CGGCCUCCUC

**Lentibulariaceae**

***Genlisea nigrocaulis Gni-MIR12112*** (ΔG=-54.7)

U C- G - C- - C

5’- UCAGCGG GGC GCG CCACCGUUGCUGGUAUCAAG CGGCG AUGA G

|||| || ||| ||| ||||||||| |||||||||| ||| | ||||

3’- GGUCUCC CCG CGC GGUGGUAACCACCAUAGUUC GCCUC UACU U

G AC - U UA U G

***Genlisea aurea Gau-MIR12112*** (ΔG=-58.3)

U C- G - C- - C

5’- UCAGGGG GGC GCG CCACCGUUGCUGGUAUCAAG CGGCGA UGA G

||||||| ||| ||| ||||||||| |||||||||| ||| || |||

3’- GGUCUCC CCG CGC GGUGGUAACCACCAUAGUUC GCCUCU ACU U

G AC - U UA A G

***Pinguicula primuliflora Ppr-MIR12112*** (ΔG=-44.6)

GAU CGGGAGACGUCU

5’-GGCG CUACCACCGCUGGUGGUAUCAAAAUCAGCA U

|||| | |||||| |||||||||||| ||| |||

3’-CCGC GGCGGUGGUAACCACCAUAGUUCUAGCCGU /

GAC UAACGAUUUCCC

**Oleaceae**

***Forsythia viridissima Fvi-MIR12112a*** (ΔG=-63.3)

-- AA A GGU-- GUG G

5’-GGUGGCGCUACCACCAUUUAUGGUAUCAAAAUCAAGUUU CC CUUCAAA GAU GGAUAAG GUGGAG U

||||| || |||||||| |||||||||| ||| ||||| || ||||||| ||| |||| || || |||

3’-CCGCCACGGCGGUGGUAACUACCAUAGUUCUAGCUCAGA GG GAAGUUU CUG CCUACUU UAGUUC U

UU G- - GAGGC AA- U

***Forsythia viridissima Fvi-MIR12112b*** (ΔG=-46.8)

UUUUU CUU-- AA C CUUUAC

5’-GGUUGCGCGACCACC UGGUAUCAAAAUCAAG CC CUUCAA AGAUG U

||| |||| ||||| ||||||||| ||| || || |||||| |||||

3’-CCGUCGCGGCGGUGG ACCAUAGUUCUAGGUC GG GAAGUU UCUAC /

UAACU AGUUU G- - AGCAUC

## *Jasminum sambac Jsa-MIR12112* (ΔG=-57.3)

UU-- U- A

5’-CAAAGGUUGUGCAGCCACCAUUUUUGGUAUCAAAUUUGAGCU CAUCUU GAC A

||| ||| |||| ||||||||| ||||||||| ||||||| || ||| |||

3’-GUUCCCGCCGCGCCGGUGGUAACUACCAUAGUUCUAGCUCGG GUUGAG CUG G

UUCU CU U

## *Syringa oblata Sob-MIR12112a* (ΔG=-47.7)

C CUAA- AGA

5’-GGUUGUGCUACCACCAUUUUUGGUAUCAAAAUCAAG UU CUUCGAC G

||| |||| |||||||| ||||||||| ||| || || |||||||

3’-CCGUCGCGGCGGUGGUAACCACCAUAGUUCUAGCUC AG GAAGUUG G

- CUCGG CGU

***Syringa oblata Sob-MIR12112b*** (ΔG=-91.03)

UUCCU AAU ----- AAGUUAGUGGAGUUGGCUAUUGAGUCAGUCUGAGGGUUUACCCAGUGGAUAGUGACGGUGGGUUCUCUC

5’-GUGCUACCACCAUUUAUGGUAUCAAAAUAAAGC GCCCCU GGG UGGCC A

|||| |||||||| |||||||||| ||| ||| |||||| ||| |||||

3’-CACGGCGGUGGUAACUACCAUAGUUCUAUCUCG UGGGGA UCC GCCGG U

UAU-- AGU UGUAG CCUCUUUAAUAGUUCUUGGAGGUGGUGGUACAAAACUUUAUCCUUCGAACUAAAAAAUAAAAAAAUAGA

***Fraxinus excelsior Fex-MIR12112a*** (ΔG=-52.4)

C UCAA U

5’-GGUUGCGCUACCACCAUUUUUGGUAUCAAAAUCAAG UC CUUCAUCAGA G

||| |||| |||||||| ||||||||| ||| || || |||||||

3’-CCGUCGCGGCGGUGGUAACUACCAUAGUUCUAGUUC AG GGGGAAGUUU /

- CUC- C

***Fraxinus excelsior Fex-MIR12112b*** (ΔG=-35.5)

UUCA AA CCA AAAA C

5’-GGU CUACCACCAUUUUUGGUAUCAAAAUC GGUU AGUUC GAUG A

||| || |||||||| ||||||||| ||| |||| ||||| ||||

3’-CCG GGCGGUGGUAACUACAAUAGUUCUAG UCAG UCGAG UUAC U

UUGC C- C-- GAAG G

***Fraxinus excelsior Fex-MIR12112c*** (ΔG=-58.0)

CCAAUCUCAAAAGAUGGUGAUGGAGGUUCCUUG

5’-GGCGGGGCUACCACCAUUUAUGGUAUCAAAAUCAAGCUU A

||||| ||| |||||||| |||||||||| ||| |||||

3’-CUGUCACGACGGUGGUAACUACCAUAGUUCUAGCUCGGA /

UUUGGGAAGUUUGUGGAGGGCGGCCUCUUUAAU

***Fraxinus excelsior Fex-MIR12112d*** (ΔG=-66.4)

CCAA GUAG-- UGUCUU

5’-GGUGGUGCUACCACCAUUUAUGGUAUCAGAAUCGAGCUU UUUCAAAAGAUG UGGAGG G

|||||| | |||||||| ||||||||| ||||||||| |||| |||||| ||||||

3’-CCGCCAAGGCGGUGGUAACUACCAUAGUUCUAGCUCGGA AAAGGCUUCUGU GCCUCU /

UUGG AGGCUG UUAAUA

***Fraxinus pennsylvanica Fpe-MIR12112a*** (ΔG=-62.8)

-- AG A GUAG-- UGUCAU

5’-GGUGGUGCUACCACCAUUUAUGGUAUUAGAAUCGAGCUU CC UUUCAAA GAUG UGGAGG G

|||||| | |||||||| ||||||||| ||||||||| || ||||||| |||| ||||||

3’-CCGCCGAGGCGGUGGUAACUACCAUAGUUCUAGUUCGGA GG GAAGUUU CUGU ACCUCU /

UU A- - AGGCUG UUAAUA

***Fraxinus pennsylvanica Fpe-MIR12112b*** (ΔG=-56.67)

--- AU AGAUGGUGAUGGAGGUUCCUU

5’-GGCGAGGCUACCACCAUUUAUGGUAUCAAAAUCAAGCUU CCU UUCAAA G

|||||| | |||||||| |||||||||| ||| ||||| ||| ||||||

3’-CCGUCACGGCGGUGGUAACUACCAUAGUUCUAGCUCGGA GGG AAGUUU G

UUU -- GUGGAGGUCGGCCUCUUUAAU

***Fraxinus americana Fam-MIR12112*** (ΔG=-64.9)

-- AG A GUAG-- UGUCAU

5’-GGUGGUGCUACCACCAUUUAUGGUAUUAGAAUCGAGCUU CC UUUCAAA GAUG UGGAGG G

|||||| | |||||||| ||||||||| ||||||||| || ||||||| |||| ||||||

3’-CCGCCGAGGCGGUGGUAACUACCAUAGUUCUAGCUCGGA GG GAAGUUU CUGU ACCUCU /

UU A- - AGGCUG UUAAUA

***Fraxinus velutina Fve-MIR12112a*** (ΔG=-52.5)

-- AG A GUAG-- UGUCAU

5’-GGUGGUGCUACCACCAUUUAUGGUAUUAGAAUCGAGCUU CC UUUCAAA GAUG UGGAGG G

|||||| | |||| ||| ||||||||| ||| ||||| || ||||||| |||| ||||||

3’-CCGCCGAGGCGGUGUUAACUACCAUAGUUCUAGAUCGGA GG GAAGUUU CUGU ACCUCU /

UU A- - AGGCUG UUAAUA

***Fraxinus velutina Fve-MIR12112b*** (ΔG=-62.87)

CCAA- AGAUGGUGAUGGAGGUUCCUCG

5’-GGCGGGGCUACCACCAUUUAUGGUAUCAAAAUCAAGCCU UUUCAAA A

||||| || |||||||| |||||||||| ||| ||||| |||||||

3’-CCGUCACGGCGGUGGUAACUACCAUAGUUCUAGCUCGGA GAAGUUU /

UUUGG GUGGAGGUCGGCCUCUUUAAU

***Fraxinus velutina Fve-MIR12112c*** (ΔG=-51.5)

UUCA UUU GUUCCAACUUCAAAAGAUG

5’-GGU CUACCACCAU UGGUAUCAAAAUCAAG C

||| | ||||||| ||||||||| ||| ||

3’-CCG GGCGGUGGUA ACCAUAGUUCUAGCUC A

UUGC CCU AGCUCAGCUCGAGGAAGUU

***Fraxinus velutina Fve-MIR12112d*** (ΔG=-51.5)

CUU-- GA UCAG

5’-GGUUGCGCUACCACCAUUUUUGGUAUCAAAUUCAAG CC CUUCA A

||| |||| |||||||| ||||||||| ||||| || |||||

3’-CCGUCGCGGCGGUGGUAACUACCAUAGUUCUAGUUC GG GAAGU U

AGUUC G- UUCG

***Olea europaea* cv. *sylvestris* *OeuS-MIR12112a*** (ΔG=-56.2)

CUAA- AGA--- GAU UUCCUU

5’-GGCGGGGUUACCACCAUUUAUGGUAUCAAAAUCAAGCUU UUUCAAA UGGC GGAGG G

||||| || |||||||| |||||||||| || ||||| ||||||| |||| |||||

3’-CCGUCACGGCGGUGGUAACUACCAUAGUUCUAACUCGGA GAAGUUU GCCG UCUCU /

UUUGG AUGGAG G-- UAAAUA

***Olea europaea* cv. *sylvestris* *OeuS-MIR12112b*** (ΔG=-50.7)

UUCAA- CAG

5’-GGUUGCGCUACCACCAUUUUUGGUAUCAAAAUCAAGUU CUUCAA G

||| |||| |||||||| ||||||||| ||| |||| ||||||

3’-CCGCCGCGGCGGUGGUAACUACCAUAGUUCUAGCUCAG GAAGUU U

CUCGGG ACG

***Olea europaea* cv. *sylvestris* *OeuS-MIR12112c***(ΔG=-41.5)

UGG CUUUCAA- UAG

5’-GGU GCUACCGUCAUUUUUGGUAUCAAAAUCAGG CUUCAA A

||| || || |||| ||||||||| |||||| ||||||

3’-CCG CGGCGGUGGUAACUACCAUAGUUCUAGUUC GAAGUU U

UCA AGCUCGGG UCG

***Olea europaea* cv. *farga OeuF-MIR12112a*** (ΔG=-56.8)

CUAA- AGA--- GA UUCCUU

5’-GGCGGGGUUACCACCAUUUAUGGUAUCAAAAUCAAGCUU UUUCAAA UGGC UGGAGG G

|| | || |||||||| |||||||||| ||| ||||| ||||||| |||| ||||||

3’-CCAUCACGGCGGUGGUAACUACCAUAGUUCUAGCUCGGA GAAGUUU GCCG GCCUCU /

UUUGG AUGGAG -- UAAAUA

***Olea europaea* cv. *farga OeuF-MIR12112b*** (ΔG=-58.3)

CUAA- AGA--- GU-- C

5’-GGCGUGGCUACCACCAUUUAUGGUAUCAAAAUCAAGCUU UUUCAAA UGGCCAUGGAG UC U

|||| || |||||||| |||||||||| || ||||| ||||||| |||||| |||| ||

3’-CCGUCACGGCGGUGGUAACUACCAUAGUUCUAACUCGGA GAAGUUU GCCGGUCUCUU AG /

UUUGG AUGGAG AAAU U

***Olea europaea* cv. *farga OeuF-MIR12112c*** (ΔG=-52.1)

UCAA- CAG

5’-GGUUGCGCUACCACCAUUUUUGGUAUCAAAAUCAAGUUU CUUCAA U

||| |||| |||||||| ||||||||| ||| ||||| ||||||

3’-CCGUCGCGGCGGUGGUAACUACCAUAGUUCUAGCUCAGG GAAGUU U

UCGCG ACG

***Olea europaea* cv. *farga OeuF-MIR12112d*** (ΔG=-57.3)

-- AA A GGUACUGAAG UAA

5’-GGUGGUGCUACCACCAUUUAUGGUAUCAGAAUCAAGCUU CC UUUCAAA GAU GUGUCUUGA U

|| ||| | |||||||| ||||||||| ||| ||||| || ||||||| ||| |||||| ||

3’-CCUCCGAGGCGGUGGUAACUACCAUAGUUCUAGCUCGGA GG GAAGUUU CUG CACAGGCCU /

UU G- - UA-------- CUU

***Olea europaea* cv. *farga OeuF-MIR12112e*** (ΔG=-40.2)

CUA CUU UA- U

5’-GGUUGCG CCAUCAUUUUUGGUAUCAAAAUCAGG UC CUUCAACAGA G

||| ||| |||||||| ||||||||| ||| || || ||||| ||||

3’-CCAUCGC GGUGGUAACUACCAUAGUUCUAGUUC AG GGGGUAGUUU /

AGC --- CUC C

***Olea europaea* cv. *farga OeuF-MIR12112f*** (ΔG=-40.4)

UGC CUUUCAA- UAG

5’-GGU GCUACCGUCAUUUUUGGUAUCAAAAUCAGG CUUCAA A

||| || || |||| ||||||||| |||||| ||||||

3’-CCG CGGCGGUGGUAACUACCAUAGUUCUAGUUC GAAGUU U

UCA AGCUCGGG UCG

***Osmanthus fragrans Ofr-MIR12112*** (ΔG=-67.4)

U-- CA AUAG-- UGUCUU

5’-GGUGGUGCUACCACCAUUUAUGGUAUCAGAAUCGAGCU CCAAUUC AAAGAUA UGGAGG G

|||||| | |||||||| ||||||||| |||||||| || ||| ||||||| ||||||

3’-CCACCGAGGCGGUGGUAACUACCAUAGUUCUAGCUCGG GGGGAAG UUUCUGU ACCUCU /

CUC -- AGGCUG UUAAUA

**Orobanchaceae**

***Aeginetia indica Ain-MIR12112*** (ΔG=-61.0)

GCUAGUCCGGCUU

5’-GGCGGAGCUGCCACCGUUGGUGGUAUCAGAAUCGAU C

|||| |||||||||||||||||||||| ||||||

3’-CCGCGGCGGCGGUGGUAACCACCAUAGUUCUAGCUG /

AGUCUAAAUGAGC

***Rehmannia glutinosa Rgl-MIR12112*** (ΔG=-49.3)

AA ACU- CAU

5’-GGCGGAUCUACCACCGUUGAUGGUAUCAAAAUC GC GGAAACC U

||||| | ||||||||| ||||||||| ||| || || ||||

3’-CCGCCGCGGCGGUGGUAACCACCAUAGUUCUAG CG CCAUUGG /

-- GCCU ACU

***Phtheirospermum japonicum Pja-MIR12112*** (ΔG=-54.2)

CACUUUCU

5’-GGCGGAGCUGCCACUGUUGAUGGUAUCAAAACCGGC A

|||| ||||||||||||| ||||||||| ||||||

3’-CCGCGGCGGCGGUGGUAACCACCAUAGUUCUGGCCG G

CCUCCAAU

***Pedicularis keiskei Pke-MIR12112*** (ΔG=-59.6)

A--- UGAU AAC CACUUUCUA

5’-GGAGGCUA CGGC CUGCCACCGUUGAUGGUAUCAA CGGC G

|||||||| |||| |||||||||||| ||||||||| ||||

3’-CCUCCGAU GCCG GGCGGUGGUAACCACCAUAGUU GCCG /

CCCA CCGC CUA CCUUCAAUG

***Orobanche minor Omi-MIR12112*** (ΔG=-38.7)

AUCUA ACA UU

5’-GCUG CCACCGUUGAUGGUAUCAGAAUCG CGGG C

|||| ||||||||| |||||||| |||| ||||

3’-CGAC GGUGGUAACCACCAUAGUUCUAGC GUUU /

----- GG- UA

***Orobanche cernua Oce-MIR12112*** (ΔG=-47.4)

G G AG

5’-GCGGAACUGCCACGAUUGUUGGUAUCAAUAUCA CCA UAG A

|||| ||||||| |||| ||||||||| |||| ||| |||

3’-CGCCGCGGCGGUGGUAACCACCAUAGUUCUAGU GGU AUC C

- - GG

***Orobanche crenata Ocr-MIR12112*** (ΔG=-46.1)

ACA UU

5’-CAGCGGAUCUACCACCGUUGAUGGUAUCAGAAUCG CGGG U

|||||| || ||||||||| |||||||| |||| ||||

3’-GUUGCCGCGACGGUGGUAACCACCAUAGUUCUAGC GUUU /

GG- UA

***Orobanche californica Oca-MIR12112*** (ΔG=-53.0)

CCAC

5’-AGCGGAGCUACCACCGUUGAUGGUAUCAUAAUCGGGCAGAGGGGA U

||||| || ||||||||| |||||||| |||||| |||| ||

3’-UCGCCGCGGCGGUGGUAACCACCAUAGUUCUAGCUUCUUUCAACU U

AACU

***Conopholis americana Cam-MIR12112*** (ΔG=-45.0)

AUCUA -- ACAUUCUUG

5’-CGGCGG CCACCAUUGAUGGUAUCAAAAUCG GGC A

|||||| ||||||||| ||||||||| |||| |||

3’-GUCGCC GGUGGUAACCACCAUAGUUCUAGC CCG A

GCGCC GG CCUUCAAUG

**Paulowniaceae**

***Paulownia fortunei Pfo-MIR12112*** (ΔG=-58.8)

GG ACU A A G

5’-GGCGGAGCUACCACCGUUGAUGGUAUCAAAAUC GC GG GUUC CU U

||||| || ||||||||| ||||||||| ||| || || |||| ||

3’-CCGCCGCGGCGGUGGUAACCACCAUAGUUCUAG CG CC CAAG GA U

A- GCU - - A

***Paulownia tomentosa Pto-MIR12112*** (ΔG=-58.8)

GG ACU A A G

5’-GGCGGAGCUACCACCGUUGAUGGUAUCAAAAUC GC GG GUUC CU U

||||| || ||||||||| ||||||||| ||| || || |||| ||

3’-CCGCCGCGGCGGUGGUAACCACCAUAGUUCUAG CG CC CAAG GA U

A- GCU - - A

***Paulownia taiwaniana Pta-MIR12112*** (ΔG=-58.8)

GG ACU A A G

5’-GGCGGAGCUACCACCGUUGAUGGUAUCAAAAUC GC GG GUUC CU U

||||| || ||||||||| ||||||||| ||| || || |||| ||

3’-CCGCCGCGGCGGUGGUAACCACCAUAGUUCUAG CG CC CAAG GA U

A- GCU - - A

**Pedaliaceae**

***Sesamum indicum Sin-MIR12112a*** (ΔG=-49.7)

AGA --- GC

5’-ACGGC GCUACCACUGUUGUUGGUAUCAAAAUUGA AGAGAU U

||||| || ||||||||| ||||||||| ||||| ||||||

3’-UGCCG CGGCGGUGGUAACCACCAUAGUUCUAGCU UCUCUA /

CGG GGU AG

***Sesamum indicum Sin-MIR12112b*** (ΔG=-51.7)

C UGAGUAGUUUCAU

5’-GGCGGAGCUACCACUGUUGGUGGUGUCAAAAU CGACUUC G

|| || || ||||||||||||||||||| || |||||||

3’-CCACCACGGCGGUGGUAACCACCAUAGUUCUA GUUGAGG /

- CCGGUUAGACGGA

***Sesamum indicum Sin-MIR12112c*** (ΔG=-45.0)

GGGCACCAAAGGCCAC

5’-ACAGCGGAGCUACCACCAUUGAUGGUAUCAAAAUC U

|| |||| || ||||||||| ||||||||| |||

3’-UGCCGCCGCGGCGGUGGUAACCACCAUAGUUCUAG G

ACAGCCCCAAAUCAAU

**Plantaginaceae**

## *Antirrhinum majus Ama-MIR12112* (ΔG=-52.0)

AC

5’-ACGGCGGAUCUACCACCGUUGAUGGUACCAAAAUCGAACGG A

||||||| | ||||||||| ||||||||| |||| |||

3’-UGCCGCCGCGGCGGUGGUAACCACCAUGGUUCUAGCCAGCU A

AG

## *Collinsia rattanii Cra-MIR12112* (ΔG=-45.8)

AUAUAUU

5’-GGCGGAGCUACCACCGUUGAUGGUAUCAGAAUCGGC U

||||| || ||||||||| ||||||||| |||||

3’-CUGCCACGGCGGUGGUAACCACCAUAGUUCCAGCUG A

GUACCAU

## *Bacopa monnieri Bmo-MIR12112a* (ΔG=-57.2)

GG AA-- CC AGUC

5’- CGGAGCUGCCACCGUUGGUGGUAUCAAAAUC GU GACAGG G

||| || ||||||||||||||||||| ||| || ||||||

3’- GCCGCGGUGGUGGUAACCACCAUAGUUCUGG CG UUGUCC /

UG CUAG A- GGCC

***Bacopa monnieri Bmo-MIR12112b*** (ΔG=-55.9)

AA-- AC GGA UUG

5’-CGGCGGAGCUACCACUAUUGUUGGUACCAAAAUC GCCC GC AUAG G

||||||||| ||||||||| ||||| ||| ||| |||| || ||||

3’-GCCGCCUCGGCGGUGGUAACCACCAUAGUUCUGG CGGG CG UAUU C

CUAG A- AA- UGC

***Bacopa monnieri Bmo-MIR12112c*** (ΔG=-33.3)

CU U AA- ---- A

5’-GGU GAACC ACCACUAUUGUUGGUAUCAAAAUC GC CC C

||| || || |||||||||| ||||||||| ||| || ||

3’-CCG CUCGG UGGUGGUAACCACCAUAGUUCUGG UG GG G

C- - CAA AUAA C

***Plantago lanceolata Pla-MIR12112*** (ΔG=-52.1)

GA UAUA UAU

5’-AGCAGCGGAUCUACCACCAUUGUUGGUGUCAAAGUCAA GCCA UCCUUG C

|||||||| | ||||||||| ||||||||| |||| |||| ||| ||

3’-UUGUUGCCACGGCGGUGGUAACCACCAUAGUUCUAGUU UGGU AGGUAC /

-- ---- UAU

***Plantago ovata Pov-MIR12112*** (ΔG=-39.9)

- AGC--- U

5’-GGAUCUACCACCAUUGUUGGUAUCAAAGUCA AGAAUC ACCC G

|| | ||||||||| ||||||||| ||| || ||| ||||

3’-CCACGGCGGUGGUAACCACCAUAGUUCUAGU UCAUAG UGGG /

C GUAAUA U

***Plantago lagopus Pla-MIR12112*** (ΔG=-50.0)

AU UAU

5’-AGCAGCGGAUCUACCACCAUUGUUGGUAUCAAAAUCAAG CCAUCCUUG C

||||| || | ||||||||| ||||||||| |||||| |||||| ||

3’-UUGUUACCACGGCGGUGGUAACCACCAUAGUUCUAGUUU GGUAGGUAC /

-- UAU

**Verbenaceae**

***Lippia dulcis Ldu-MIR12112a*** (ΔG=-41.2)

CGU AGUC - G

5’-GCGGAGCUACCACCAU UGGUAUUAAAAUC ACAG CG A

||| || ||||||| ||||||||| ||| |||| ||

3’-CGCGGCGGCGGUGGUA ACCAUAAUUCUAG UGUC GC G

ACC CCC- C A

***Lippia dulcis Ldu-MIR12112b*** (ΔG=-49.2)

C--- ACU

5’-GCGGAGCUACCACCGUUGUUGGUAUCAAAAUCCGCCA UGA G

|||| || ||||||||| ||||||||| ||| |||| |||

3’-CGCCGCGGCGGUGGUAACCACCAUAGUUCUAGUCGGU GCU A

UUAA GGA

**Lamiaceae**

## *Mentha longifolia Mlo-MIR12112a* (ΔG=-51.5)

AGC G GAUU U

5’-GGCGGAGCUACCACCAUUGUUGGUAUCAAAAUC GA UGGG UC G

||||| || ||||||||| ||||||||| ||| || |||| ||

3’-CCGCCGCGGCGGUGGUAACCACCAUAGUUCUAG CU AUCC AG U

CA- - AAGU C

***Mentha longifolia Mlo-MIR12112b*** (ΔG=-40.8)

AGC - UCU CUCU A

5’-GGCGG UC UCAUCAUCGGUGAUAUCAAAAUC CUG GAUU A

||||| || |||||||||||| |||||| ||| ||| ||||

3’-CCGCC AG AGUGGUGGCCACCAUAGUUCUAG GAC CUAA U

GC- C CU- U--- G

***Pogostemon cablin Pca-MIR12112*** (ΔG=-49.4)

GAU GAUC

5’-GGCGGAGCUAUCACCGUUGAUGGUAUCAAAAUCAGUG GGC A

||||| ||| |||||||| ||||||||| ||| ||| |||

3’-CCGCCGCGGCGGUGGUAACCACCAUAGUUCUAGCCGC UCG A

G-- AUUU

***Ocimum tenuiflorum Ote-MIR12112*** (ΔG=-58.3)

GCCAC - A GG

5’-GGCGGGGCUACCACCGUUGUUGGUAUCAAAAUCG CGG AG CGUCU U

||||| || ||||||||| ||||||||| |||| ||| || |||||

3’-CCGCCGCGGCGGUGGUAACCACCAUAGUUCUAGC GCU UC GCAGA /

----- A - AA

***Tectona grandis Tgr-MIR12112a*** (ΔG=-52.2)

AACAGUUAAGACAACUG

5’-GGCGGAGCUACCACCGUUGAUGGUAUCAAAAUCG U

||||| || ||||||||| ||||||||| ||||

3’-CCGCCGCGGCGGUGGUAACCACCAUAGUUCUAGC C

CGUAUACAUCGAAUGAA

***Tectona grandis Tgr-MIR12112b*** (ΔG=-45.1)

U CU-- AUU

5’-GGCGGAGCUACCGCCGUUGGGGGUAUCAAAAUC GAC CUAAUUG U

||||| ||| |||||||| |||||||| ||| ||| |||||||

3’-CCGCCGCGGCAGUGGUAACUACCAUAGUUCUAG CUG GGGUAAC U

- AUUC ACC

***Isodon rubescens Iru-MIR12112a*** (ΔG=-52.2)

ACC-- GUU

5’-GGCGGAGCUACCACCAUUGUUGGUAUCAAAAUCG GCU A

||||| || ||||||||| ||||||||| |||| |||

3’-CCGCCGCGGCGGUGGUAACCACCAUAGUUCUAGC CGA A

GCUUU AGG

***Isodon rubescens Iru-MIR12112b*** (ΔG=-34.7)

C- C- GCCA

5’-GGUGGAGCUAUCACUAUUGGUCGUAUCAAAAU UUGA UUCG U

|||| || ||||||||||| ||||||| || |||| ||||

3’-UUACUGCGGCAGUGAUAACCACCAUAGUUCUG GACU AAGU U

UU UU ACUU

***Ocimum americanum Oam-MIR12112*** (ΔG=-54.3)

U C-- AG

5’-GGCGGAGCUACCACCGUUGUUGGUAUCAAAAUC GC AGCAG A

||||| || ||||||||| ||||||||| ||| || |||||

3’-CCGCCGCGGCGGUGGUAACCACCAUAGUUCUAG CG UCGUC C

- CUA AC

***Ocimum basilicum Oba-MIR12112*** (ΔG=-54.3)

U C-- AG

5’-GGCGGAGCUACCACCGUUGUUGGUAUCAAAAUC GC AGCAG A

||||| || ||||||||| ||||||||| ||| || |||||

3’-CCGCCGCGGCGGUGGUAACCACCAUAGUUCUAG CG UCGUC C

- CUA AC

***Plectranthus barbatus Pba-MIR12112*** (ΔG=-52.8)

AG- GAG CGCU

5’-GGCGGAGCUACCACCAUUGUUGGUAUCAGAAUC UUAGCU AC G

||||| || ||||||||| |||||||| ||| |||||| ||

3’-CCGCCGCGGCGGUGGUAACCACCAUAGUUCUAG AGUCGA UG /

CGG AA- AUUU

***Perilla frutescens Pfr-MIR12112*** (ΔG=-45.3)

UGA G GUGGAGACGGCU

5’-GGC GCUACCACCAUUGUUGGUAUCAAAAUCA CUA G

||| || ||||||||| ||||||||| |||| |||

3’-CCG CGGCGGUGGUAACCACCAUAGUUCUAGU GGU /

CCG - AUCGAAGGAAUU

***Salvia miltiorrhiza Smi-MIR12112a*** (ΔG=-48.9)

UAAGU AA

5’-GCGGAGCUACCACCAUUGUUGGUAUCAAAAUCAGC GCU G

|||| || ||||||||| ||||||||| ||| || |||

3’-CGCCGCGGCGGUGGUAACCACCAUAGUUCUAGCCG CGA G

UGU-- A-

***Salvia miltiorrhiza Smi-MIR12112b*** (ΔG=-48.4)

AGUAAGC G

5’-CGGCGAAGCUACCACCAUUGUUGGUAUCAAAAUC GGAGAG U

||||| || ||||||||| ||||||||| ||| ||| ||

3’-GCCGCCGCGGCGGUGGUAGCCACCAUAGUUCUAG CCUGUC A

C------ A

***Salvia Hispanica Shi-MIR12112*** (ΔG=-51.8)

UA AA

5’-GGCGGAGCUACCACCGUUGUUGGUAUCAAAAUCAGC GCGCU G

||||| || ||||||||| ||||||||| || || |||||

3’-CCGCCGCGGCGGUGGUAACCACCAUAGUUCCAGCCG UGUGA G

-- AA

***Salvia sclarea Ssc-MIR12112*** (ΔG=-48.3)

- AAU

5’-GGCGGAGCUACCACCAUUGUUGGUAUCAAAAUC AGCCAGUGUU C

|||| || ||||||||| ||||||||| ||| || |||| ||

3’-CCGCGGCGGCGGUGGUAACCACCAUAGUUCUAG UCUGUCGAAG /

C GAA

***Rosmarinus officinalis Rof-MIR12112*** (ΔG=-51.0)

A -- GUUA

5’-GGCGGAGCUACCACCAUUGUUGGUAUCAAAAUC GC CAGU G

||||| || ||||||||| ||||||||| ||| || ||||

3’-CCGCCGCGGCGGUGGUAACCACCAUAGUUCUAG CG GUCG /

- CU AAGG

***Prunella vulgaris Pvu-MIR12112*** (ΔG=-43.0)

UCCACUCUAA

5’-GGCGGAGCUACUACCAUUGUUGGUAUCAAAAUCA A

|||| || ||||||||| ||||||||| ||||

3’-CCGCGGCGGCGGUGGUAACCACCAUAGUUCUAGU G

GCUAACGAAG

***Dracocephalum tanguticum Dta-MIR12112*** (ΔG=-53.0)

AAUCAGCACUGAUAGUAGCU

5’-GGCGGAGCUACCACCAUUGUUGGUAUCAA A

||||| || ||||||||| |||||||||

3’-CCGCCGCGGCGGUGGUAACCACCAUAGUU C

CUAGUGGCAUCGAUUGUAGU

***Mentha spicata Msp-MIR12112a*** (ΔG=-51.3)

AGC G GGAUU U

5’-GGCGGAGCUACCACCAUUGUUGGUAUCAAAGUC GA UGGG UC G

||||| || ||||||||| ||||||||| || || |||| ||

3’-CCGCCGCGGCGGUGGUAACCACCAUAGUUCUAG CU AUCC AG U

CA- - AAGU- C

***Mentha spicata Msp-MIR12112b*** (ΔG=-34.0)

AGC - CUCU CUCU A

5’-GCGG UC UCAUCAUCGGUGAUAUCAAAAU CUG GAUU A

|||| || |||||||||||| |||||| || ||| ||||

3’-CGCC AG AGUGGUGGCCACCAUAGUUCUA GAC CUAA U

GC- C ACU- U--- G

***Scutellaria baicalensis* *Sba-MIR12112*** (ΔG=-46.6)

A UCUGUUAAC CUU

5’-GGCGGAGCUGCCACUAUUGUGGGUAUCAAAAUC GG GU A

||||| || ||||||||| |||||||| ||| || ||

3’-CCGCCGCGGUGGUGGUAACCACCAUAGUUCUAG CC CG U

- UCUAUAUAU AAU

| **Table S1.** A list of high throughput illumina and 454 RNA-seq data analyzed for *MIR058* and *AasPPO-as-hp*. | | |
| --- | --- | --- |
| **Plant species** | **Accession No.** | **Run No.** |
| *Vitis rotundifolia* | SRX039037 | SRR094945 |
| *Vitis aestivalis* | SRX1550688, SRX1550510, SRX1550507, SRX1550503, SRX1546688 | SRR3131028, SRR3130557, SRR3130547, SRR3130543, SRR3123776 |
| *Vitis amurensis var. dissecta* | SRX247622 | SRR769842 |
| *Vitis amurensis var. amurensis from Russia* | SRX247624 | SRR769844 |
| *Vitis amurensis var. amurensis from China* | SRX247612 | SRR769832 |
| *Vitis quinquangularis* | SRX1496837-SRX1496848 | SRR3046439-SRR3046450 |
| *Vitis pseudoreticulata* | SRX679312, SRX658543 | SRR1535993, SRR1522047 |
| *Vitis riparia x Vitis rupestris* | SRX1023840 | SRR2016902 |
| *Ampelocissus ascendiflora* | SRX1323074 | SRR2603953 |

| **Table S2.** A list of high throughput illumina and 454 RNA-seq data analyzed for *MIR12112*. | | |
| --- | --- | --- |
| **Plant species** | **Accession No.** | **Run No.** |
| *Acanthus leucostachyus* | SRX868795 | SRR1793319 |
| *Acanthus ilicifolius* | SRX868790 | SRR1793312 |
| *Andrographis paniculata* | SRX655521, SRX652837, SRX544977, SRX237258 | SRR1519326, SRR1519324, SRR1292497, SRR719255 |
| *Genlisea nigrocaulis* | ERX379242-ERX379245, ERX272592, ERX272579, ERX270157, ERX270156 | ERR412881-ERR412884, ERR299267, ERR299254, ERR296826, ERR296825 |
| *Genlisea aurea* | SRX319576, SRX312272 | SRR929654, SRR916071 |
| *Pinguicula primuliflora* | SRX2372561 | SRR5053674 |
| *Forsythia viridissima* | SRX1070794, SRX1070793 | SRR2075825, SRR2075824 |
| *Jasminum sambac* | SRX868796, SRX868770 | SRR1793302,SRR1793303 |
| *Syringa oblata* | SRX1270858, SRX1270857, SRX1267308 | SRR2475368-SRR2475370,SRR247536-SRR2475367, SRR2474554-SRR2474556 |
| *Fraxinus excelsior* | ERX1527563-ERX1527606 | ERR1457085-ERR1457128 |
| *Fraxinus pennsylvanica* | SRX273492, SRX272955, SRX858401-SRX858431 | SRR837513, SRR837512, SRR1778773-SRR1778803 |
| *Fraxinus americana* | SRX272960 | SRR837509 |
| *Fraxinus velutina* | SRX823915 | SRR1734680 |
| *Olea europaea* | ERX1418257-ERX1418262, ERX348219-ERX348223 | ERR1346603-ERR1346608, ERR375842-ERR375846 |
| *Osmanthus fragrans* | SRX1023176-SRX1023178 | SRR2014622, SRR2014621, SRR2005989 |
| *Aeginetia indica* | DRX076502, DRX076494 | DRR082669-DRR082671, DRR082658, DRR082659 |
| *Rehmannia glutinosa* | SRX700631, SRX700629, SRX700627, SRX357355, SRX460646, SRX460645, SRX269426, SRX269425, SRX128593 | SRR1574817, SRR1574816, SRR1574815, SRR999317, SRR1156406, SRR1156405, SRR832973, SRR832972, SRR444423 |
| *Phtheirospermum japonicum* | DRX076504 | DRR082673 |
| *Pedicularis keiskei* | DRX076503, DRX076495-DRX076497 | DRR082672, DRR082660-DRR082662 |
| *Orobanche minor* | DRX076501, SRX968210, DRX076491-DRX076493 | DRR082666-DRR082668, SRR1929115, DRR082655-DRR082657 |
| *Orobanche cernua* | SRX964401, SRX960209, SRX105034 | SRR1925329, SRR1920906, SRR364823 |
| *Orobanche crenata* | SRX105035 | SRR364822 |
| *Orobanche californica* | SRX2067901 | SRR4099897 |
| *Conopholis americana* | SRX959493 | SRR1919543 |
| *Paulownia fortunei* | SRX1479063-SRX1479066, SRX1153476, SRX1153473, SRX1092110, SRX1092108, SRX368249 | SRR3055053, SRR3055054, SRR3056087-SRR3056090, SRR3054796, SRR3054797, SRR2167549, SRR2167546, SRR2097254, SRR2097251, SRR1106698 |
| *Paulownia tomentosa* | SRX1535422,SRX365649, SRX365528 | SRR3107164, SRR3107165, SRR1013711, SRR1013710 |
| *Paulownia taiwaniana* | SRX369244, SRX366911, SRX366360 | SRR1019856, SRR1015453, SRR1014729 |
| *Antirrhinum majus* | SRX1613693-SRX1613698 | SRR3204378, SRR3204380-SRR3204384 |
| *Collinsia rattanii* | SRX202812 | SRR611171 |
| *Bacopa monnieri* | SRX1386651 | SRR2826837 |
| *Plantago lanceolata* | SRX2021793-SRX2021809 | SRR4030251-SRR4030268 |
| *Plantago ovata* | SRX1013183 | SRR2001613 |
| *Plantago lagopus* | ERX1203455, ERX1203456 | ERR1124256, ERR1124257 |
| *Lippia dulcis* | SRX096988, SRX040283, SRX040284 | SRR343117, SRR099035-SRR099038 |
| *Mentha longifolia* | SRX1613915, SRX1613916 | SRR3204554, SRR3204556 |
| *Pogostemon cablin* | SRX1297345, SRX1297346, SRX848973 | SRR2541465, SRR2541466, SRR1770488 |
| *Ocimum tenuiflorum* | SRX810861, SRX760129 | SRR1715044, SRR1653607 |
| *Tectona grandis* | SRX1074799-SRX1074804, SRX1074825, SRX1074834-SRX1074837, SRX1074851-SRX1074858, SRX2352466-SRX2352468 | SRR2080094-SRR2080099, SRR2080127, SRR2080128, SRR2080131, SRR2080132, SRR2080137, SRR2080138, SRR2080148-SRR2080156,SRR5026221, SRR5026236-SRR5026238 |
| *Isodon rubescens* | SRX235928, SRX096934, SRX079018 | SRR714241, SRR343060, SRR290367 |
| *Ocimum americanum* | SRX1030327-SRX1030330 | SRR2029848-SRR2029851 |
| *Ocimum basilicum* | SRX482722, SRX1447332-SRX1447335 | SRR1185318, SRR2954843-SRR2954846 |
| *Plectranthus barbatus* | SRX235906, SRX079017 | SRR1633977, SRR290366 |
| *Perilla frutescens* | SRX2070756, SRX2070757, DRX045252-DRX045256, DRX026627, DRX026628, SRX1059431, DRX045223-DRX045232 | SRR4106088, SRR4106089, DRR050212-DRR050216, DRR029567-DRR029570, SRR2063890 SRR2063892 SRR2063895-SRR2063897, DRR050183-DRR050192 |
| *Salvia Hispanica* | SRX263422, SRX263425, SRX263427, SRX263428, SRX263430 | SRR824071, SRR824104, SRR824079-SRR824081 |
| *Salvia sclarea* | SRX350388, SRX003341 | SRR983807, SRR014553 |
| *Rosmarinus officinalis* | ERX337160, SRX079014, SRX063894-SRX063905, SRX063908, SRX063909, SRX063890, SRX063892 | ERR364391, SRR290363, SRR290364, SRR210795-SRR210806,SRR210808, SRR210809, SRR210791, SRR210793 |
| *Prunella vulgaris* | SRX246105, SRX130243, SRX096128 | SRR766790, SRR446369, SRR342049 |
| *Dracocephalum tanguticum* | SRX1434959-SRX1434970, SRX1434925, SRX1434924, SRX1434918, SRX1430330, SRX1430321, SRX1427409 | SRR2924873, SRR2924875-SRR2924885, SRR2924872, SRR2919252, SRR2919239, SRR2915458, SRR2915457, SRR2915400 |
| *Mentha spicata* | DRX015157-DRX015159, SRX533470-SRX533473 | DRR016804-DRR016806, SRR1271562, SRR1271568, SRR1271572, SRR1271573 |
| *Scutellaria baicalensis* | SRX1700374-SRX1700376, SRX726670, SRX1546377, SRX1542916 | SRR3367955-SRR3367957, SRR1605127, SRR3123399, SRR3130396, SRR3114960, SRR3727161 |
